# Supplementary material for: Synthesis, structural characterization, and theoretical analysis of novel zinc(ii) schiff base complexes with halogen and hydrogen bonding interactions
Source: Royal Society of Chemistry journal article supplement (doi:10.1039/d4ra06217e), 2024-01-01
Supplement: d4ra06217e1.pdf [file d4ra06217e1.pdf]

# Synthesis, Structural Characterization, and Theoretical Analysis of Novel Zinc(II) Schiff Base Complexes with Halogen and Hydrogen Bonding Interactions

Md Gishan<sup>a</sup>, Puspendu Middy<sup>a</sup>, Michael G. B. Drew<sup>b</sup>, Antonio Frontera<sup>c\*</sup> and Shouvik Chattopadhyay<sup>a\*</sup>

<sup>a</sup>Department of Chemistry, Jadavpur University, Kolkata 700032, India. E-mail: [shouvik.chattopadhyay@jadavpuruniversity.in](mailto:shouvik.chattopadhyay@jadavpuruniversity.in)

<sup>b</sup>School of Chemistry, The University of Reading, P.O. Box 224, Whiteknights, Reading RG6 6AD, UK

<sup>c</sup>Department of Chemistry, Universitat de les Illes Balears, Crta de Valldemossa km 7.5, 07122 Palma de Mallorca (Balears), SPAIN; E-mail: [toni.frontera@uib.es](mailto:toni.frontera@uib.es)

## Hirshfeld surface analysis

Crystal Explorer 21.5<sup>S1</sup> software has been used to calculate Hirshfeld surfaces<sup>S2-S4</sup> and the related two-dimensional fingerprint<sup>S5, S6</sup> plots. The bond lengths to hydrogen atoms have been set to standard values. The distance from the point to the nearest nucleus external to the surface ( $d_e$ ) and the distance to the nearest nucleus internal to the surface ( $d_i$ ) are defined for each point on the Hirshfeld surface to calculate the normalized contact distance ( $d_{\text{norm}}$ ) using the appropriate formula.<sup>S7</sup>

The  $d_{\text{norm}}$  value may be less than zero or more than zero depending on the relative values of intermolecular contacts and van der Waals separations. The Hirshfeld surface with a red-white-blue color scheme is displayed with the  $d_{\text{norm}}$  parameter. Shorter contacts are indicated by the bright red spots. White areas represent contacts around the van der Waals

separation and blue regions, on the other hand, signify absence of any close contacts. It is needless to say that the Hirshfeld surface is unique for a given CIF.<sup>S8</sup>

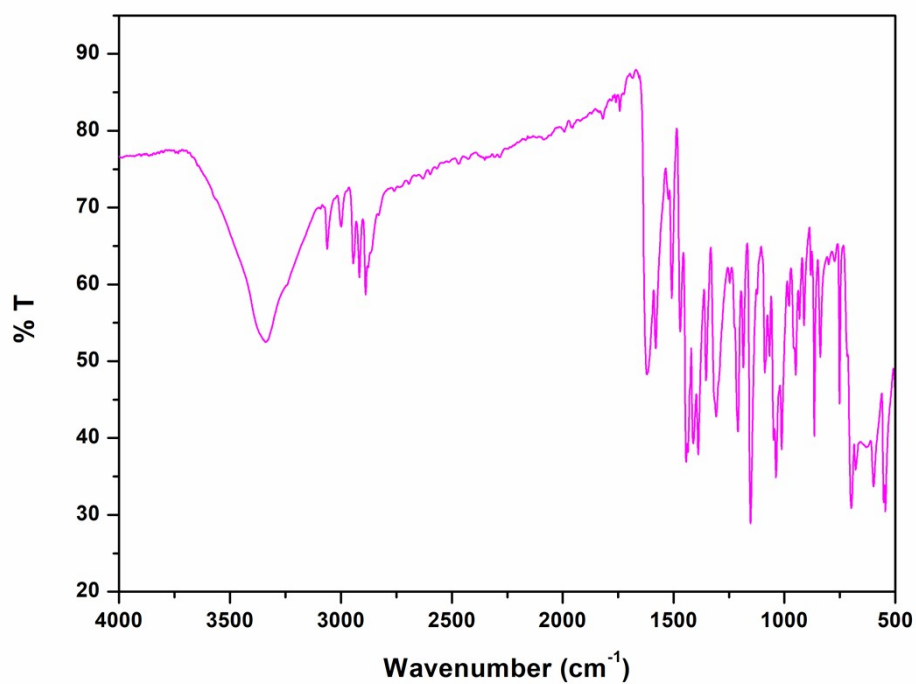

**Fig. S1.** IR spectrum of complex 1.

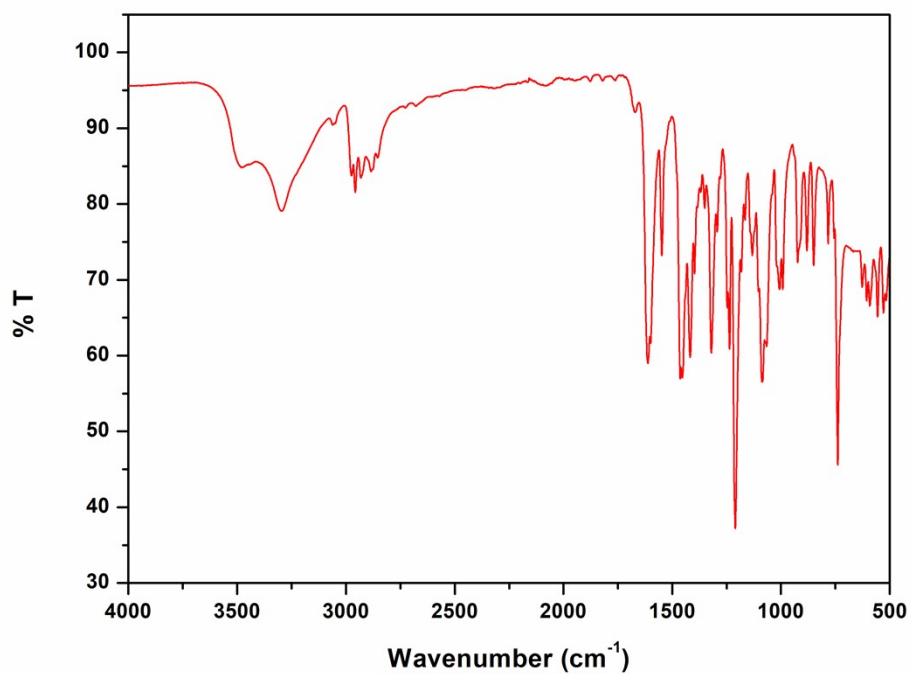

**Fig. S2.** IR spectrum of complex 2.

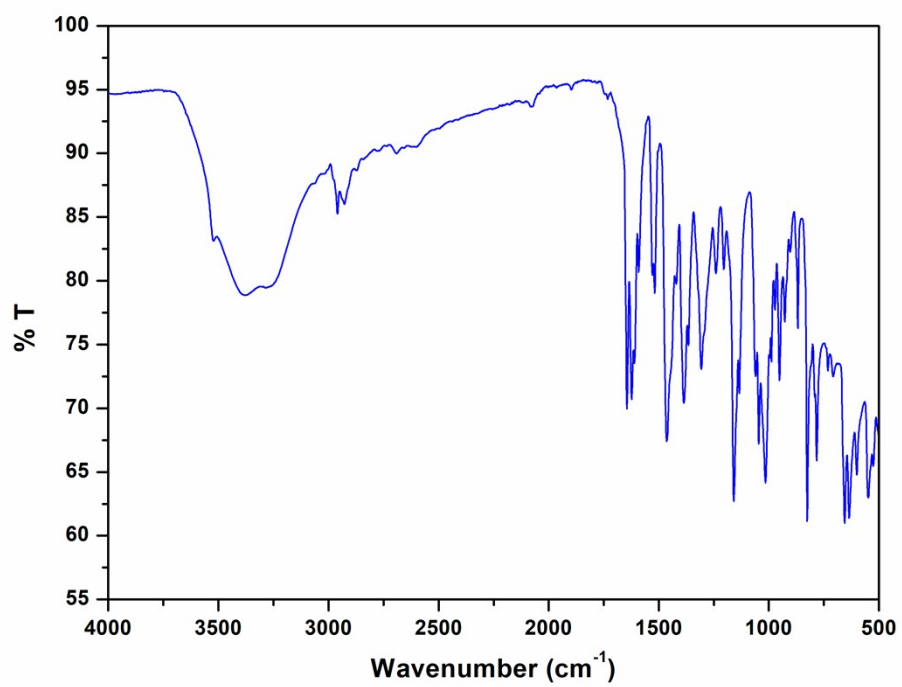

**Fig. S3.** IR spectrum of complex 3.

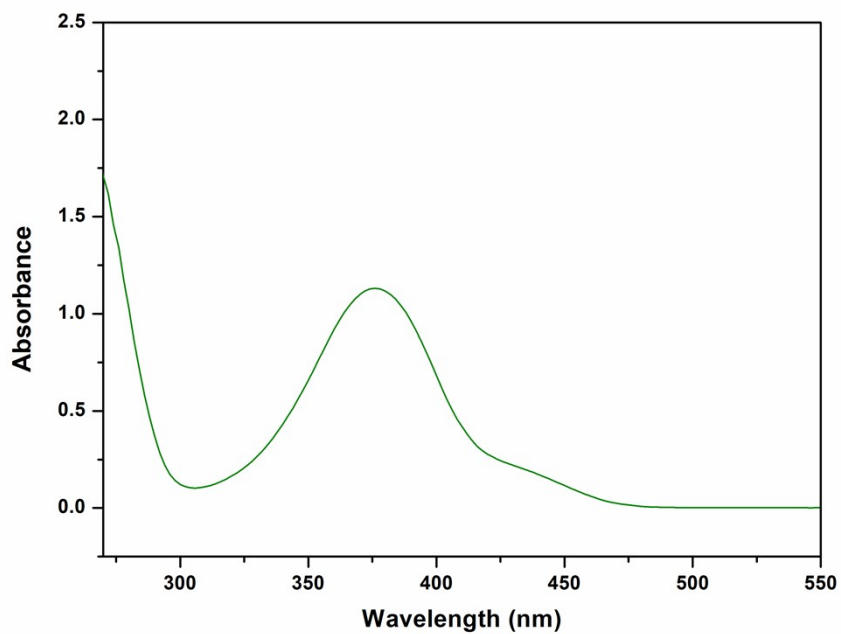

**Fig. S4.** The UV spectrum of complex 1 in methanol.

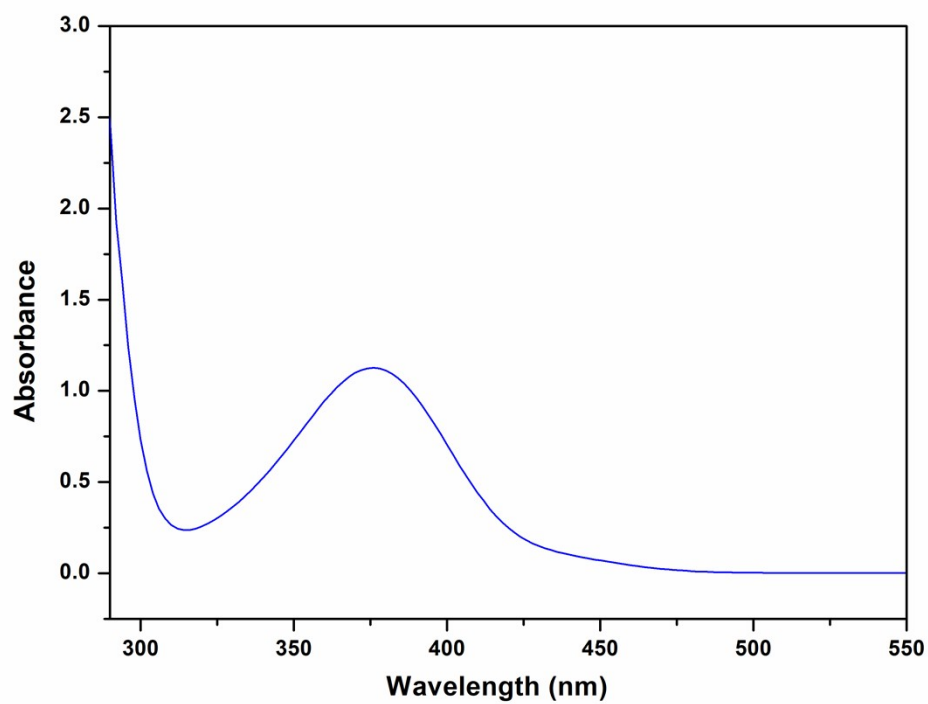

**Figure S5.** The UV spectrum of complex **2** in methanol.

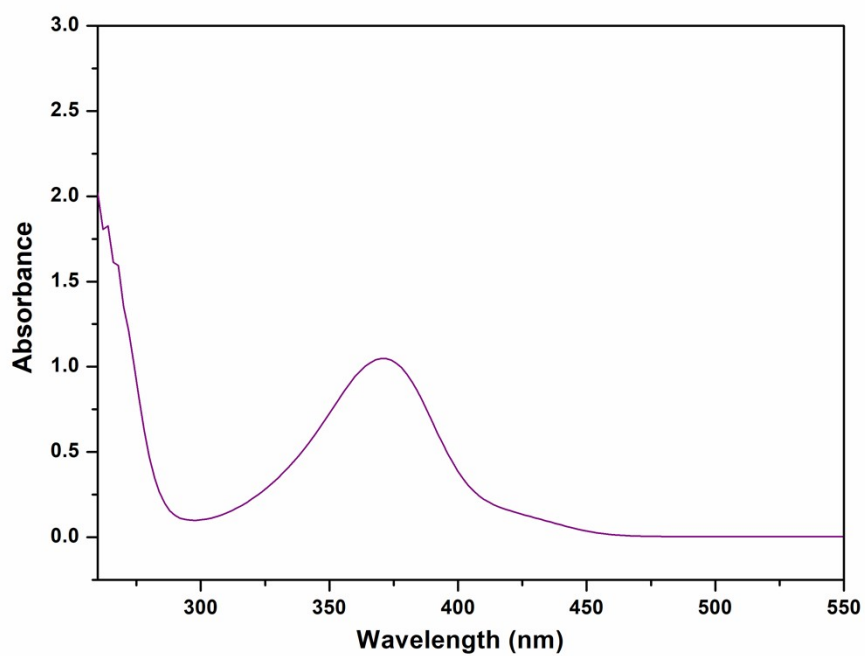

**Fig. S6.** The UV spectrum of complex **3** in methanol.

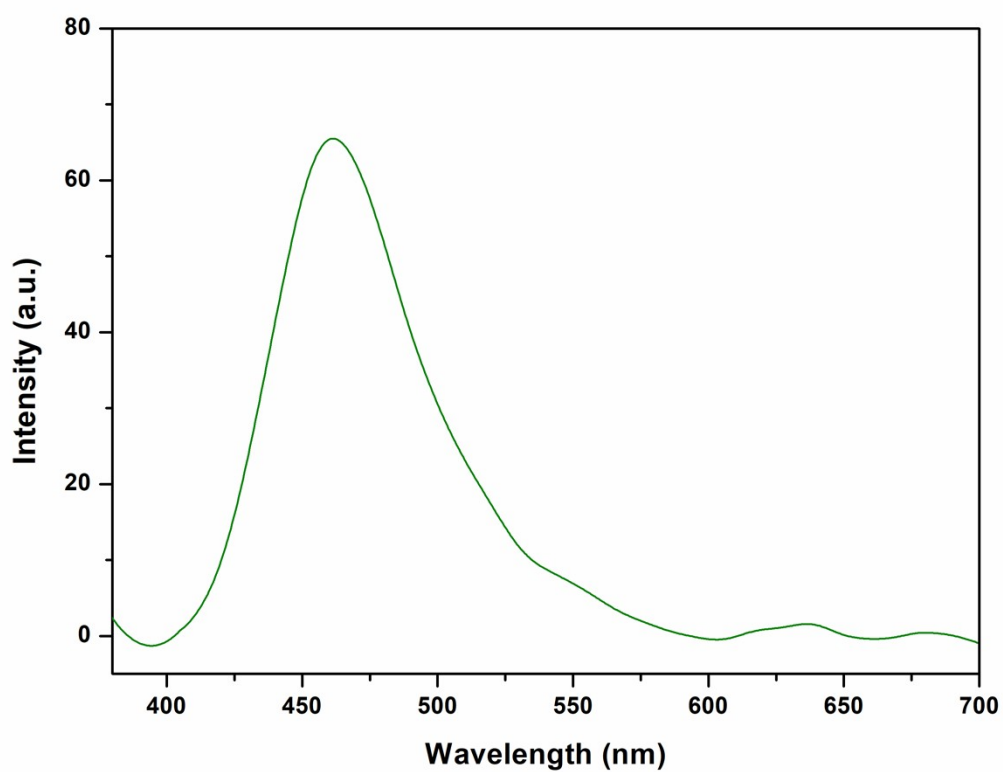

**Fig. S7.** The fluorescence spectrum of complex 3.

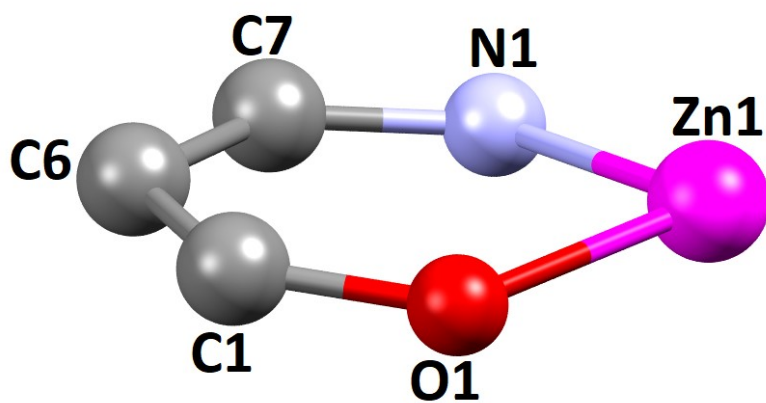

**Fig. S8.** The perspective view of envelope conformation of saturated six-member ring [Zn(1)-O(1)-C(1)-C(6)-C(7)-N(1)] in complex 1.

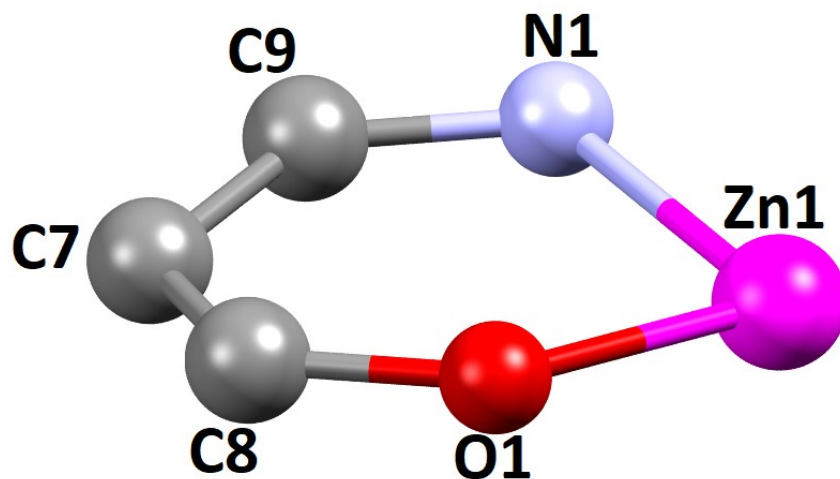

**Fig. S9.** The perspective view of envelope conformation of saturated six-member ring [Zn(1)-O(1)-C(8)-C(7)-C(9)-N(1)] in complex 2.

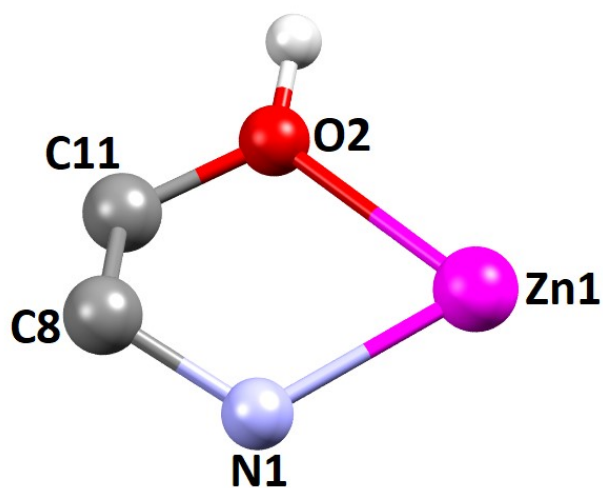

**Fig. S10.** The perspective view of envelope conformation of saturated five-member ring [Zn(1)-O(2)-C(11)-C(8)-N(1)] in complex 3.

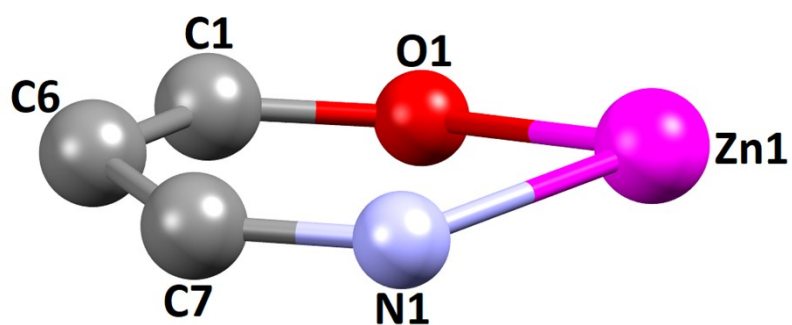

**Fig. S11.** The perspective view of screw-boat conformation of saturated six-member ring [Zn(1)-O(1)-C(8)-C(7)-C(9)-N(1)] in complex **3**.

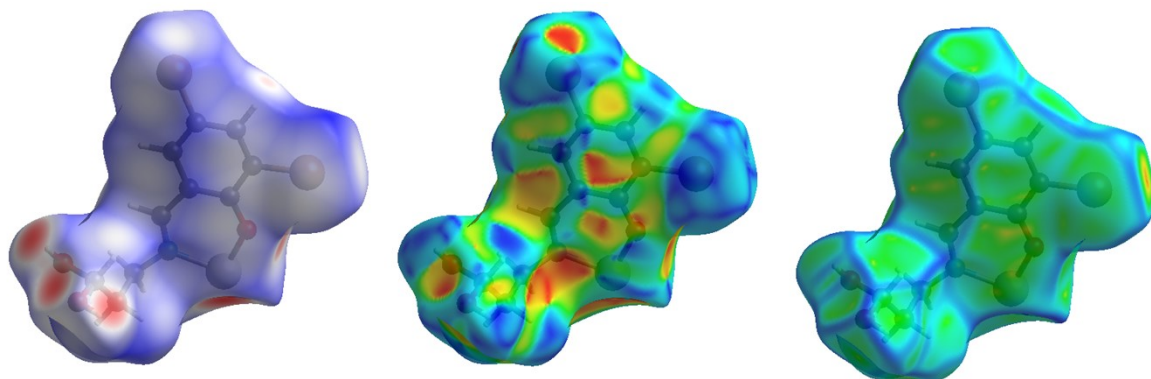

**Fig. S12.** Hirshfeld surfaces of complex **1**, mapped over  $d_{\text{norm}}$  (left), shape index (middle) and curvedness (right).

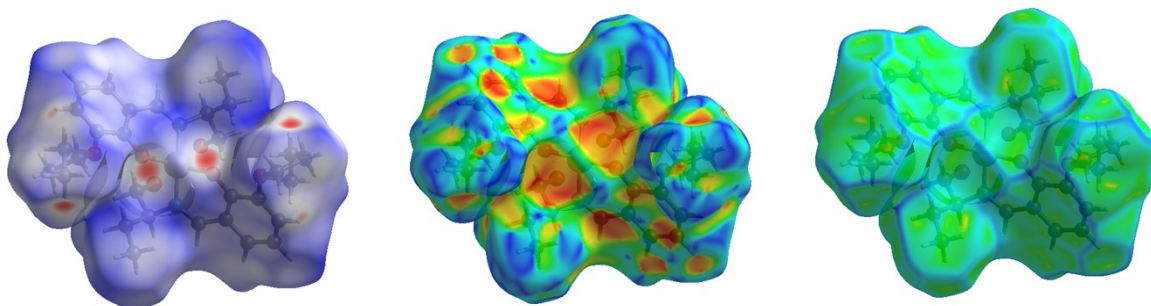

**Fig. S13.** Hirshfeld surfaces of complex **2**, mapped over  $d_{\text{norm}}$  (left), shape index (middle) and curvedness (right).

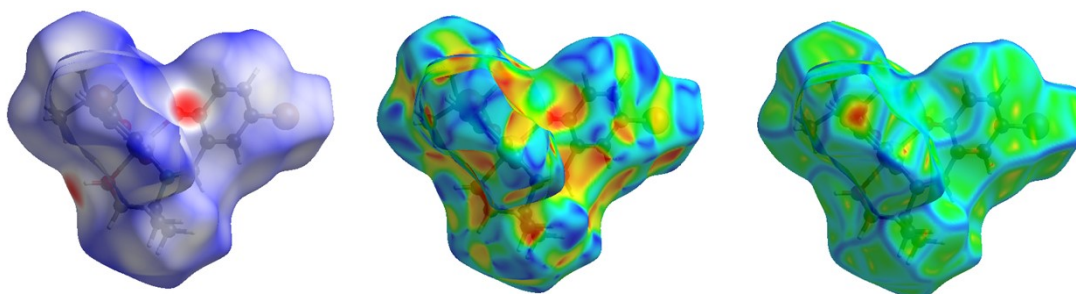

**Fig. S14.** Hirshfeld surfaces of complex **3**, mapped over  $d_{\text{norm}}$  (left), shape index (middle) and curvedness (right).

## References

S1 M. A. Spackman and J. J. McKinnon, *CrystEngComm*, 2002, **4**, 378-392.

S2 M. A. Spackman and D. Jayatilaka, *CrystEngComm*, 2009, **11**, 19-32.

S3 F. L. Hirshfeld, *Theor. Chem. Acta*, 1977, **44**, 129-135.

S4 H. F. Clausen, M.S. Chevallier, M. A. Spackman and B. B. Iversen, *New J. Chem.*, 2010, **34**, 193-199.

S5 A. L. Rohi, M. Moret, W. Kaminsky, K. Claborn, J. J. McKinnon and B. Kahr, *Cryst. Growth Des.*, 2008, **8**, 4517-4525

S6 A. Parkin, G. Barr, W. Dong, C. J. Gilmore, D. Jayatilaka, J. J. McKinnon, M. A. Spackman and C. C. Wilson, *CrystEngComm*, 2007, **9**, 648-652

S7 T. Basak, A. Bhattacharyya, M. Das, K. Harms, A. Bauza', A. Frontera and S. Chattopadhyay, *Chem. Select*, 2017, **2**, 6286– 6295.

S8 F. H. Allen, O. Kennard, D. G. Watson, L. Brammer, A. G. Orpen and R. J. Taylor, *J. Chem. Soc. Perkin Trans.*, 1987, **2**, S1-S19.
